# Supplementary material
Source: Springer Nature journal article supplement (https://www.springermedizin.de/resource/supplementary/12893_2012_296_MOESM3_ESM.pdf/9512036)

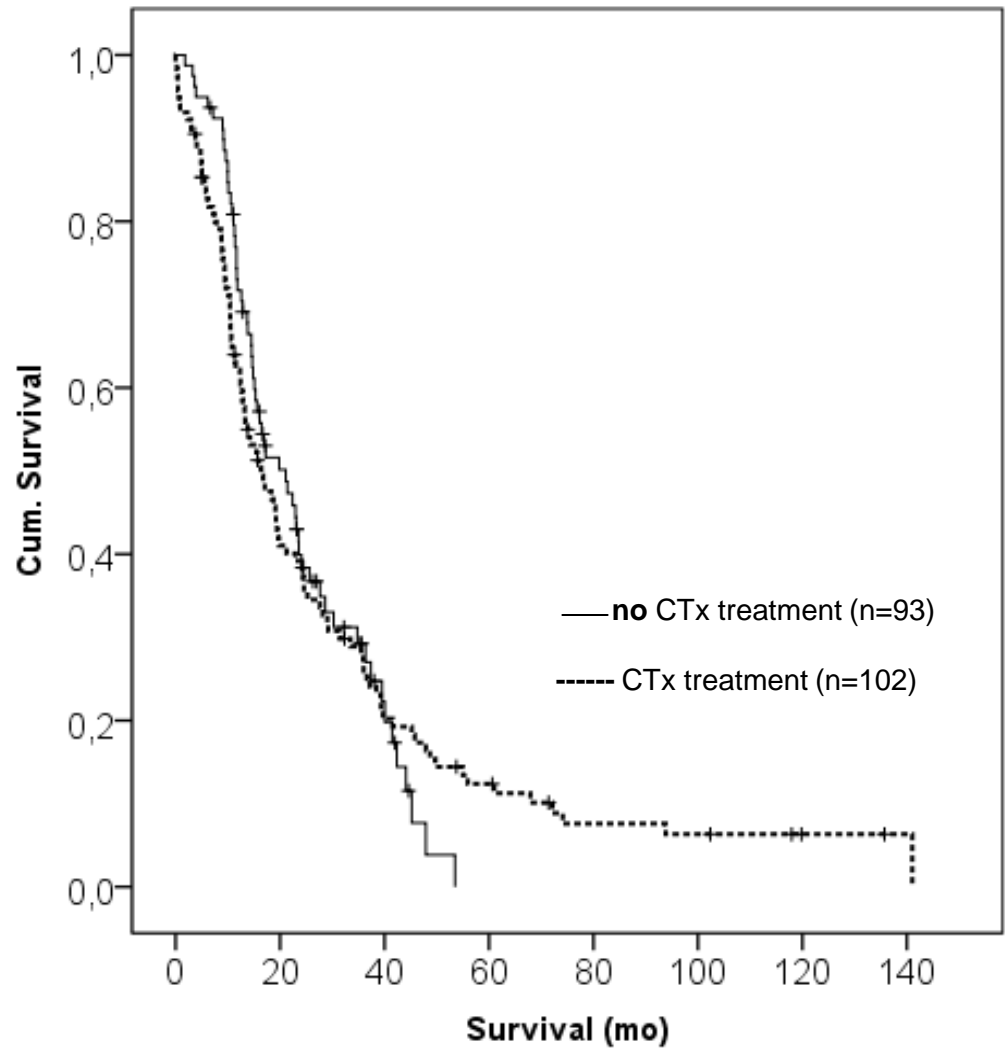

Supplement: MOESM3 [file 9512036]
